# Supplementary material
Source: PubMed Central journal article supplement (PMC3210209)

## **Supplementary Materials and Methods**

### **Cell adhesion assay**

96-well plates were coated with 3.67  $\mu\text{g}/\mu\text{l}$  of rat-tail collagen I or 2.5  $\mu\text{g}/\text{cm}^2$  of fibronectin overnight at 4°C. Wells were rinsed with 1X PBS the following day, preheated to 37°C, for surface neutralization. Remaining binding sites were blocked with 0.1% bovine serum albumin (BSA) in PBS for a period of 1hr. Cells were plated with LNCaP or C4-2 cells at  $30 \times 10^4$  per well. After incubation for 20 or 60 minutes, cells were treated with percoll flotation medium and percoll fixative for 15 minutes, washed with PBS and treated with 0.5% crystal violet staining, washed again and allowed to dry overnight. An automated plate reader was used to quantitate cell attachment on the next day, once each well was solubilized with Sorenson solution, and OD read at 590 nm.

### **Supplementary Figure 1**

There is no difference in cell adhesion to fibronectin and collagen I between LNCaP and C4-2 cells. Cell adhesion assay was performed on parental LNCaP or parental C4-2 prostate cancer cell lines. Adhesion was measured on fibronectin or collagen matrices through a 20 minute time period

Neal et al., Supplemental Figure 1

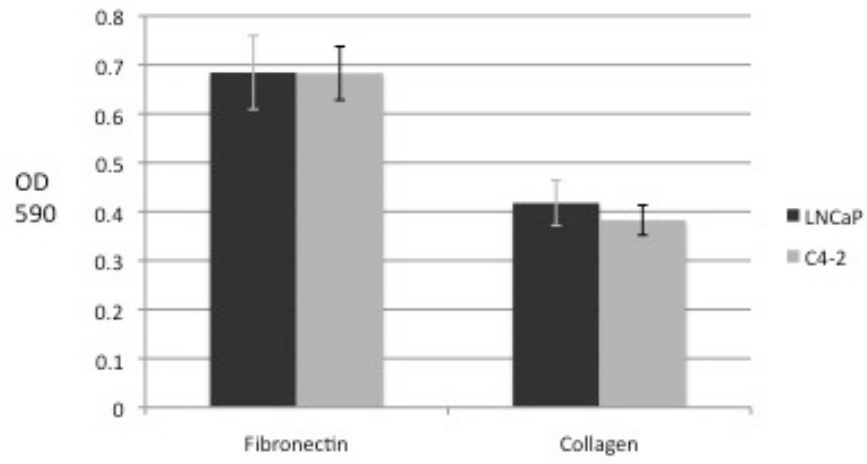

Supplement: cam0503_0249SD1.pdf [file cam0503_0249SD1.pdf]
